# Supplementary material for: Photoexcited graphene oxides activate silent viruses in bacteria with dependency on their sizes
Source: Royal Society of Chemistry journal article supplement (doi:10.1039/d2en00395c), 2022-01-01
Supplement: d2en00395c1.pdf [file d2en00395c1.pdf]

**Materials.** L-glutathione (GSH, reduced, 98%), N-acetyl-L-cysteine (NAC), DL-dithiothreitol (DTT), Vitamin E (VE), diphenylisobenzofuran (DPBF), 2',7'-dichlorofluorescein diacetate (DCFH-DA) and tellurium powder (99.999%, approximately 200 mesh) were obtained from Sigma-Aldrich and were used without further purification. All other reagents were of analytical grade. Ultrapure water with a conductivity of  $18.2 \text{ M}\Omega \text{ cm}^{-1}$  (Millipore Simplicity) was used in all aqueous solutions. Other chemicals and reagents were purchased from Bide Pharmatech Ltd.

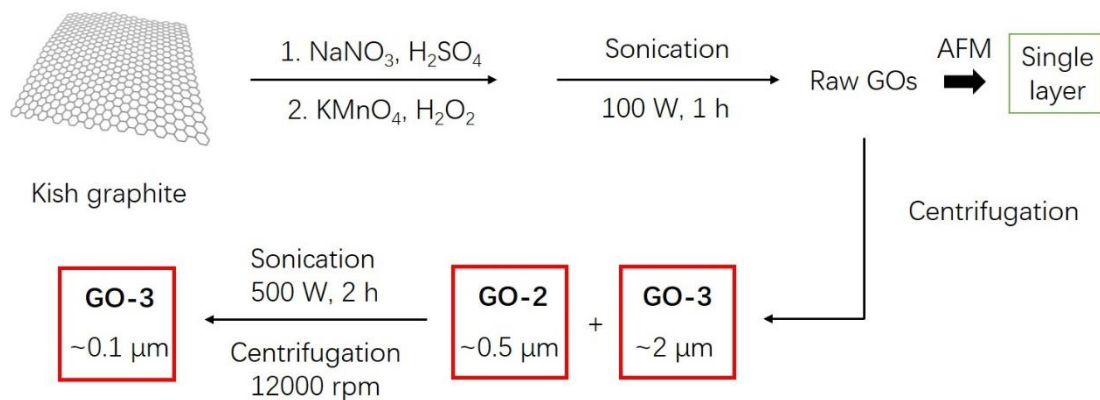

**Figure S1.** Scheme of the preparation procedures of GOs with different sizes.

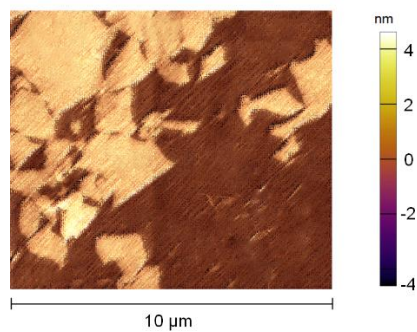

**Figure S2.** AFM image indicates single layer structure of the as-prepared raw GOs, as depicted in Figure S1.

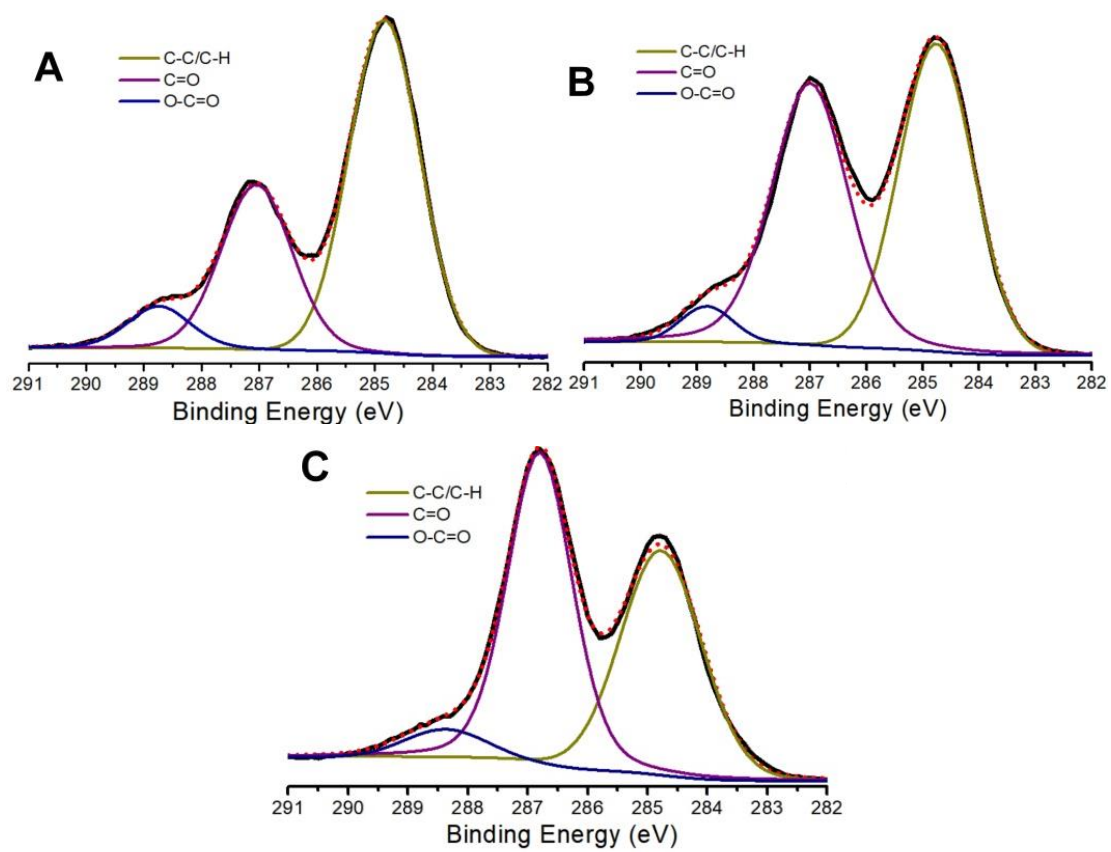

**Figure S3.** Peak deconvolution of C1s XPS core level of GO-1, GO-2, and GO-3.

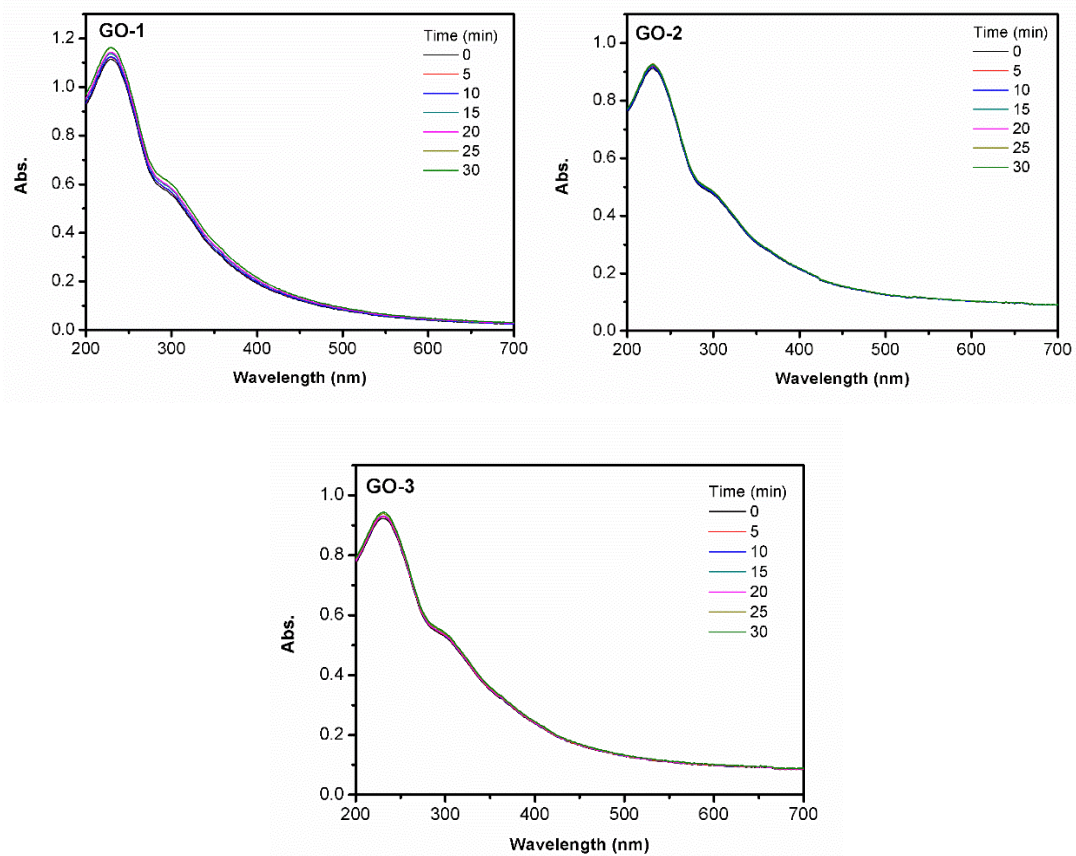

**Figure S4.** UV-vis spectra of GO-1, GO-2, and GO-3 under different irradiation time.

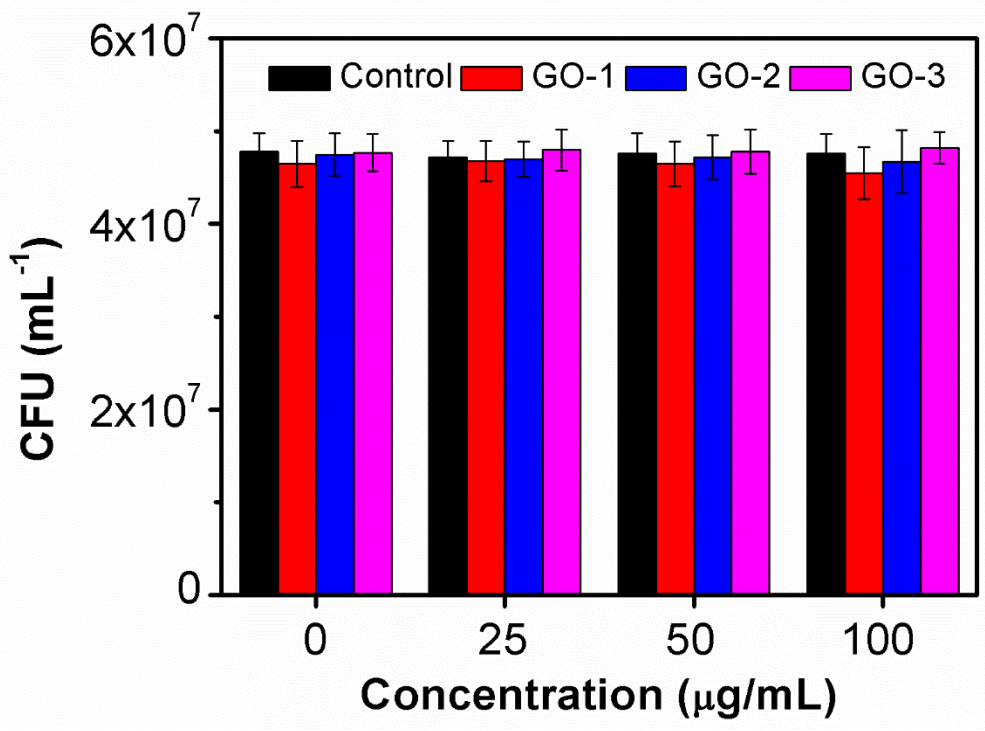

**Figure S5.** Measurement of colony-forming unit (CFU) of *E. coli* ( $\lambda$ -) suspensions with GOs after incubated for 8 hours.

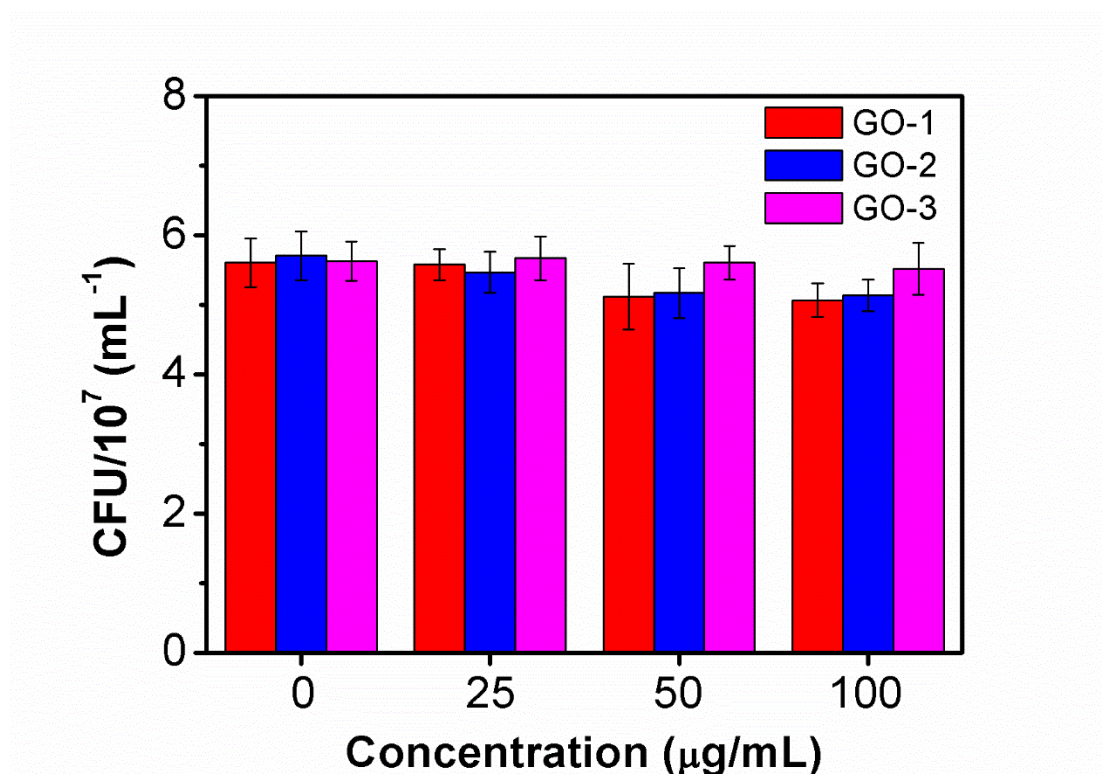

**Figure S6.** Measurement of colony-forming unit (CFU) of *E. coli* ( $\lambda$ -) suspensions with GOs and 20 min white light irradiation after incubated for 8 hours.

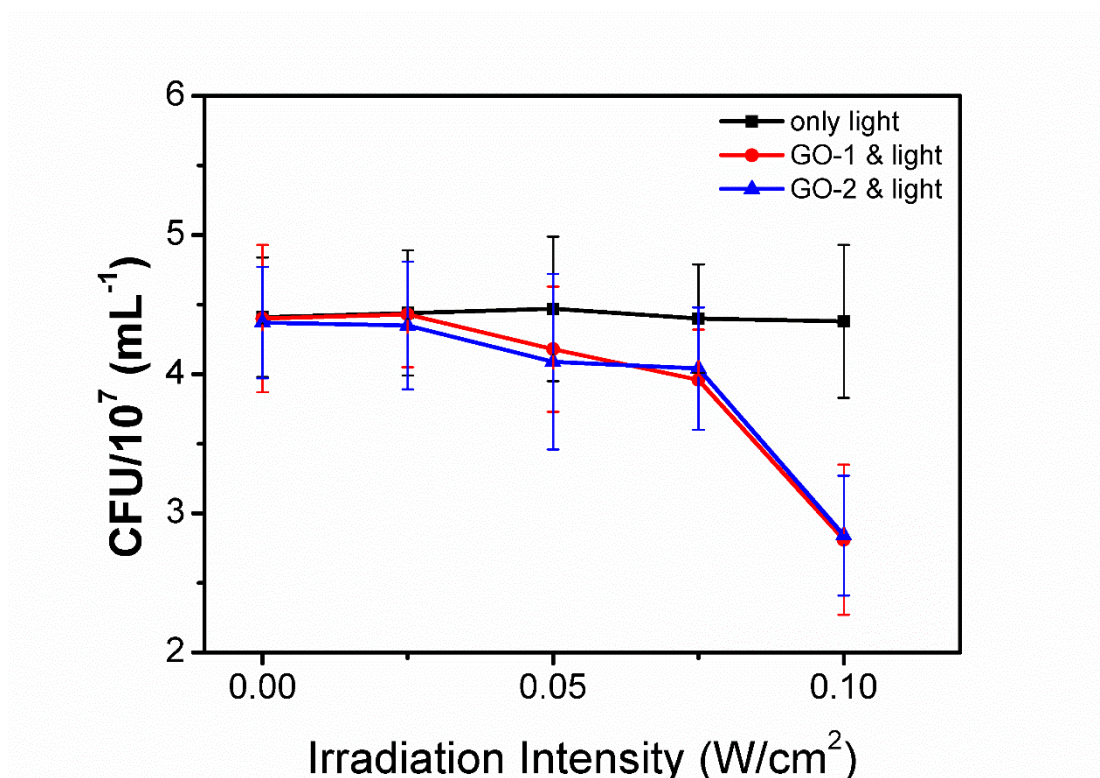

**Figure S7.** Determination of critical irradiation intensity for lysogenic activation. Colony-forming unit (CFU) of *E. coli* ( $\lambda^+$ ) suspensions were calculated after treated with GOs and white light irradiation (30 min).



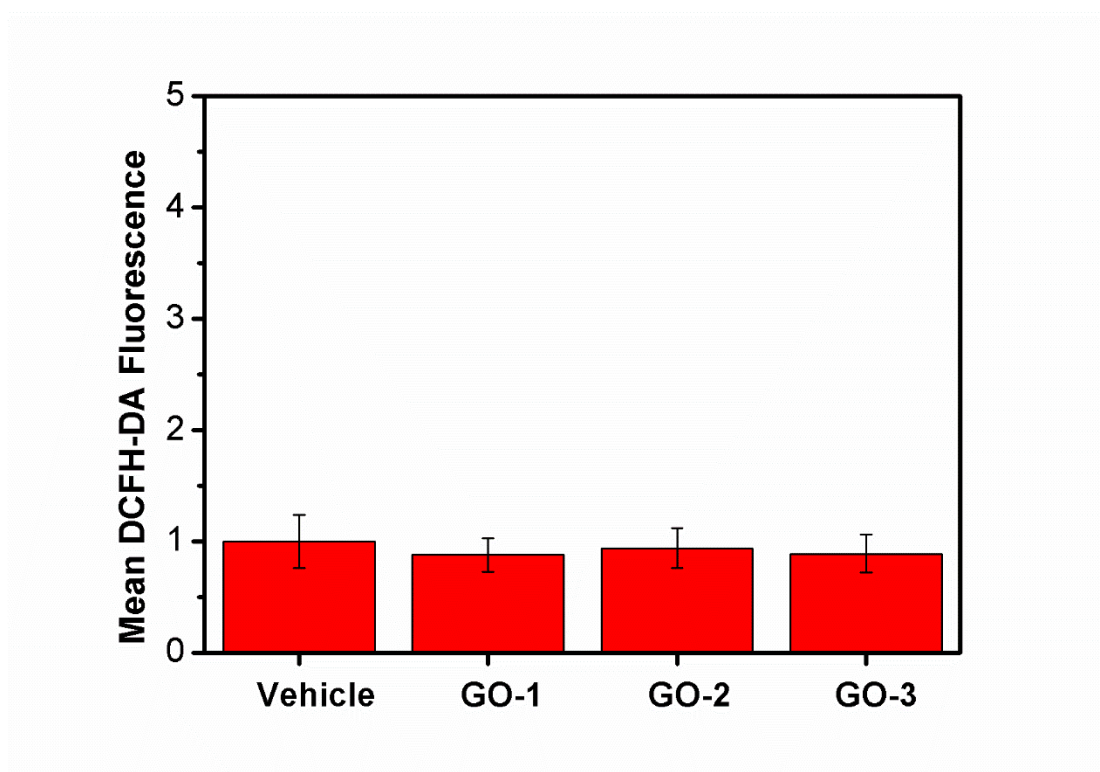

**Figure S8.** Intracellular ROS level of *E. coli* ( $\lambda^+$ ) treated with GOs. ROS level were determined by fluorescence of DCFH-DA.

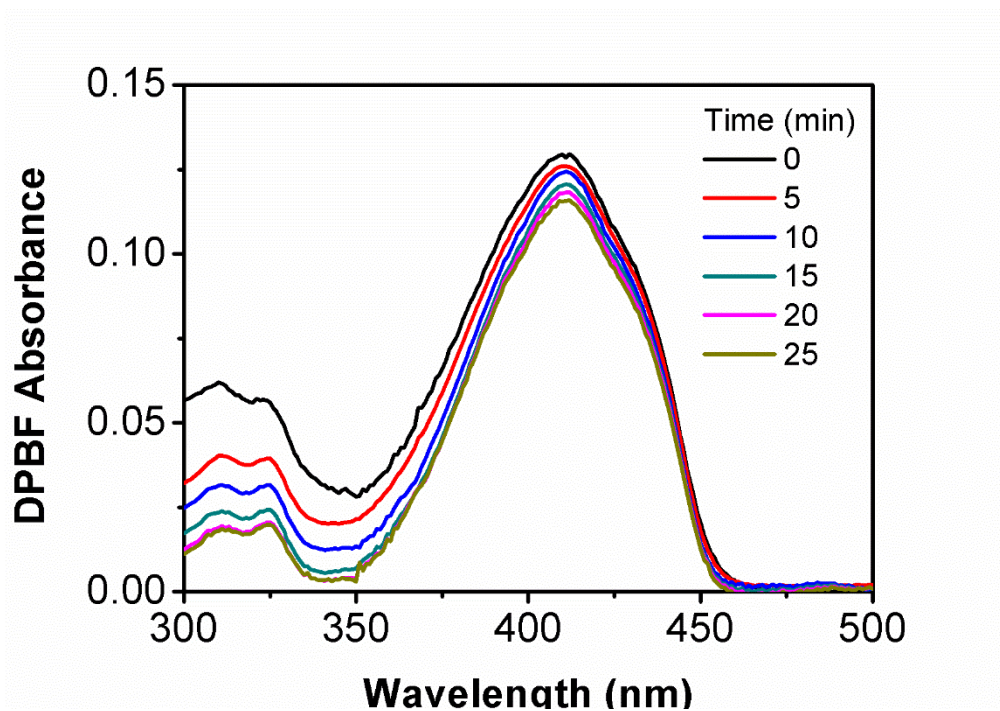

**Figure S9.** Measurements of photogenerated  $^1\text{O}_2$  by GO-1-PEG via decomposition of DPBF.  $c(\text{GO-1-PEG}) = 1.0 \mu\text{g/mL}$ ,  $c(\text{DPBF}) = 50 \mu\text{M}$ .

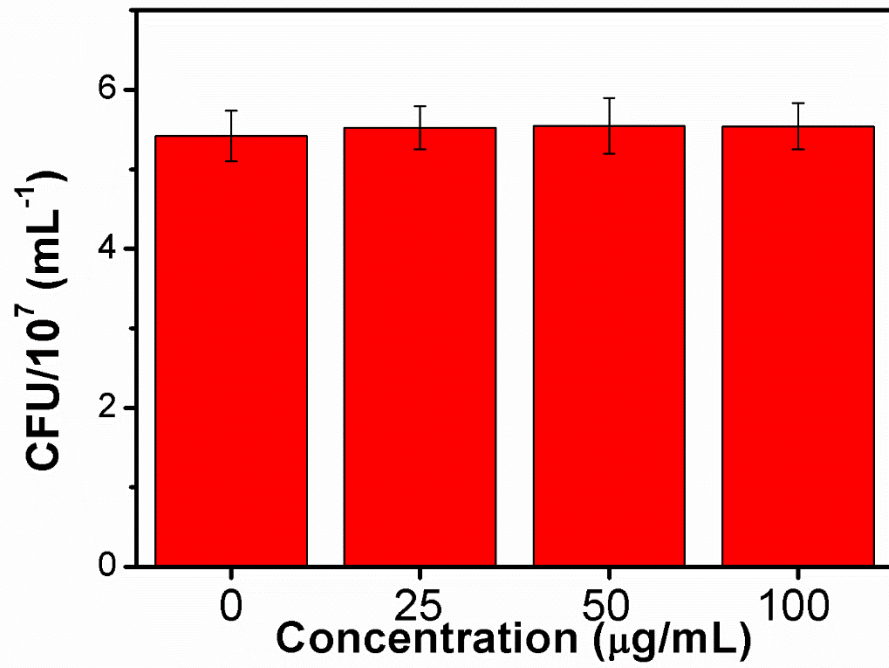

**Figure S10.** Measurement of colony-forming unit (CFU) of *E. coli* ( $\lambda$ +) suspensions with GO-1-PEG in dark for 8 hours.

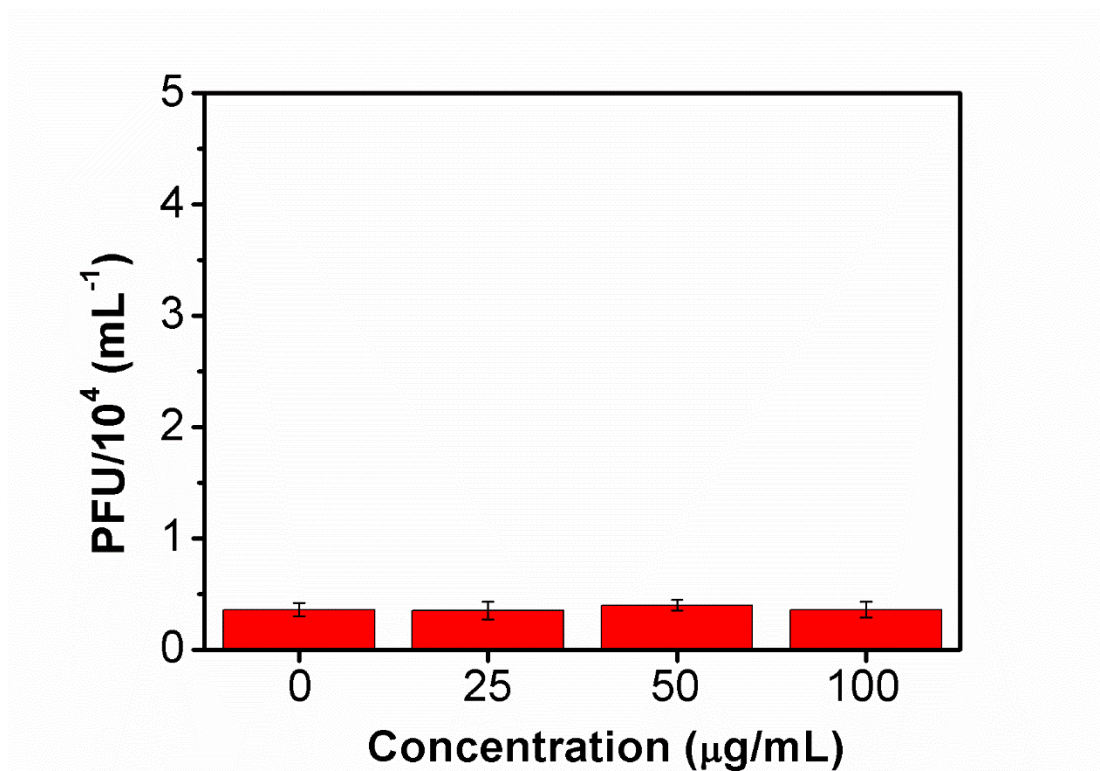

**Figure S11.** Measurement of PFU of *E. coli* ( $\lambda^+$ ) suspensions with GO-1-PEG in dark after incubated for 8 hours.

**Table S1.** Zeta-potential of GOs stored in bacterial medium at room temperature for 3 days.

|      | 0 days              |                   | 3 days             |                   |
|------|---------------------|-------------------|--------------------|-------------------|
|      | Zeta-potential (mV) | Hydrodynamic (nm) | Zeta-potential(mV) | Hydrodynamic (nm) |
| GO-1 | $-31.5 \pm 1.1$     | $134 \pm 18$      | $-31.0 \pm 1.4$    | $139 \pm 15$      |
| GO-2 | $-30.8 \pm 1.4$     | $858 \pm 78$      | $-31.4 \pm 1.7$    | $836 \pm 65$      |
| GO-3 | $-30.8 \pm 1.2$     | $2180 \pm 220$    | $-30.3 \pm 1.4$    | $2250 \pm 240$    |
